# Supplementary material for: Histogram Analysis of Diffusion Kurtosis Magnetic Resonance Imaging for Diagnosis of Hepatic Fibrosis
Source: PubMed Central journal article supplement — Korean J Radiol. 2018 Aug 6;19(5):916–22. doi: 10.3348/kjr.2018.19.5.916 (PMC6082766; doi:10.3348/kjr.2018.19.5.916), 2018-08-06
Supplement: kjr-19-916-s001.pdf [file kjr-19-916-s001.pdf]

**Supplementary Table 1. Correlations between Magnetic Resonance Histogram Parameters (D, K, and ADC) and METAVIR Inflammatory Activity Score**

|          | D        |                  |          | K        |                  |          | ADC      |                  |          |
|----------|----------|------------------|----------|----------|------------------|----------|----------|------------------|----------|
|          | <i>r</i> | 95% CI           | <i>P</i> | <i>r</i> | 95% CI           | <i>P</i> | <i>r</i> | 95% CI           | <i>P</i> |
| Mean     | -0.534   | -0.772 to -0.257 | < 0.001* | 0.078    | -0.282 to 0.442  | 0.637    | -0.209   | -0.521 to 0.166  | 0.201    |
| Median   | -0.635   | -0.795 to -0.407 | < 0.001* | 0.217    | -0.129 to 0.501  | 0.186    | -0.190   | -0.505 to 0.171  | 0.246    |
| 25th     | -0.676   | -0.789 to -0.486 | < 0.001* | 0.182    | -0.156 to 0.513  | 0.267    | -0.076   | -0.420 to 0.276  | 0.646    |
| 75th     | -0.525   | -0.779 to -0.222 | 0.001*   | 0.118    | -0.220 to 0.510  | 0.473    | -0.336   | -0.569 to -0.025 | 0.036*   |
| Skewness | 0.124    | -0.282 to 0.471  | 0.451    | -0.417   | -0.648 to -0.090 | 0.008*   | -0.164   | -0.471 to 0.159  | 0.319    |
| Kurtosis | 0.186    | -0.194 to 0.517  | 0.258    | 0.098    | -0.268 to 0.453  | 0.554    | -0.188   | -0.495 to 0.155  | 0.253    |

\**p* < 0.05. ADC = apparent diffusion coefficient, CI = confidence interval, D = corrected apparent diffusion, K = kurtosis
